1  
2  
3  
4  
5  
6  
7  
8  
9  
10  
11  
12  
13  
14  
15  
16

Chromatin Compaction by Small RNAs and the Nuclear RNAi Machinery in *C. elegans*

Brandon D. Fields<sup>1,2</sup> and Scott Kennedy<sup>2\*</sup>

1 Laboratory of Genetics, University of Wisconsin-Madison, Madison, WI 53706, USA

2 Department of Genetics, Harvard Medical School, Boston, MA 02115, USA

\*Corresponding author: [kennedy@genetics.med.harvard.edu](mailto:kennedy@genetics.med.harvard.edu)

Department of Genetics, Harvard Medical School

77 Avenue Louis Pasteur

New Research Building 266

Boston, MA. 02215

Ph: 617-432-1235

17 **Abstract :**

18 DNA is organized and compacted into higher-order structures in order to fit within nuclei and to  
19 facilitate proper gene regulation. Mechanisms by which higher order chromatin structures are  
20 established and maintained are poorly understood. In *C. elegans*, nuclear-localized small RNAs engage  
21 the nuclear RNAi machinery to regulate gene expression and direct the post-translational modification of  
22 histone proteins. Here we confirm a recent report suggesting that nuclear small RNAs are required to  
23 initiate or maintain chromatin compaction states in *C. elegans* germ cells. Additionally, we show that  
24 experimentally provided small RNAs are sufficient to direct chromatin compaction and that this  
25 compaction requires the small RNA-binding Argonaute NRDE-3, the pre-mRNA associated factor  
26 NRDE-2, and the HP1-like protein HPL-2. Our results show that small RNAs, acting via the nuclear  
27 RNAi machinery and an HP1-like protein, are capable of driving chromatin compaction in *C. elegans*.

28

29

30 **Introduction:**

31 Chromatin compaction is necessary for chromosome function. For instance, global chromatin  
32 compaction is needed for chromosome segregation during mitosis and meiosis while more localized  
33 chromatin compaction is associated with chromosomal structures such as centromeres (constitutive  
34 heterochromatin) as well as developmental gene regulation (facultative heterochromatin). Several  
35 molecular systems have been identified in eukaryotic cells that mediate chromatin compaction. For  
36 instance, the condensin family of proteins hydrolyze ATP to mediate a stepwise compaction of DNA that,  
37 in large part, underlies global chromatin compaction preceding mitosis and meiosis <sup>1,2</sup>. In addition,  
38 Polycomb Repressive Complexes (PRCs) 1/2, which regulate HOX genes during development, are two  
39 histone-modifying complexes that have been associated with localized chromatin compaction *in vivo* and  
40 *in vitro* <sup>3,4</sup>. Finally, HP1 is a non-histone protein that is a defining feature of heterochromatin in  
41 eukaryotes <sup>5-8</sup>. Tethering HP1 to genes is sufficient to induce chromatin compaction and gene silencing,  
42 suggesting that HP1 proteins may directly mediate chromatin compaction and that this compaction may  
43 regulate gene expression <sup>9,10</sup>. HP1 proteins typically possess a chromodomain and a chromoshadow  
44 domain <sup>11,12</sup>. The HP1 chromodomain binds post translationally modified histone 3 such as Histone 3  
45 Lysine 9 trimethylation (H3K9me3), while the chromoshadow domain is important for HP1 homo-  
46 dimerization <sup>13,14</sup>. HP1-like proteins are able to compact H3K9me3 containing chromatin *in vitro* and the  
47 ability of HP1 to mediate chromatin compaction *in vivo* depends upon the ability of HP1 to homodimerize  
48 <sup>15,16</sup>. These observations have led to a model in which HP1-like proteins directly mediate chromatin  
49 compaction by bridging distant chromatin sites that harbor H3K9me3.

50 RNAi is an evolutionarily conserved gene regulatory mechanism triggered by double-stranded  
51 RNA (dsRNA). dsRNA is recognized and processed by Dicer-like enzymes into small interfering RNAs  
52 (siRNAs) of 21-25 nucleotides in length <sup>17</sup>. siRNAs are bound by Argonaute (AGO) proteins to form  
53 ribonucleoprotein complexes that use the sequence information contained within siRNAs to regulate  
54 complementary RNAs *in trans* (via Watson-Crick base pairing) <sup>18</sup>. In many eukaryotes, siRNAs are found  
55 in nuclei where they bind nascent RNAs to co-transcriptionally regulate gene expression as well as  
56 direct the deposition of H3K9me3 on chromatin (termed nuclear RNAi) <sup>18</sup>. In *S. pombe*, nuclear siRNAs,

57 H3K9me3, and HP1 help maintain heterochromatin at the pericentromere<sup>19</sup>. During this process, an  
58 RNA-dependent RNA polymerase enzyme Rdp1 uses nascent RNAs, which are transcribed from the  
59 pericentromere, to amplify pericentromere siRNA populations. Amplified siRNAs bind the Argonaute  
60 protein Ago1, interact with nascent pericentromeric RNAs, and recruit the H3K9 methyltransferase  
61 enzyme Clr4. Once localized, Clr4 generates H3K9me3, which acts as a signal to recruit the HP1-like  
62 protein Swi6 as well as promote further Ago1/chromatin interactions<sup>13,19–25</sup>. Thus, siRNAs, H3K9me3,  
63 and HP1 act together in a feed-forward loop to promote heterochromatin formation in fission yeast.  
64 Argonaute proteins have been linked linked to H3K9 methylation and heterochromatin formation in many  
65 other eukaryotes including, plants, insects, and mammals<sup>18,26,27</sup>. In some cases, a different class of  
66 small RNA, termed piRNA, substitutes for siRNAs during heterochromatin formation<sup>28</sup>. In summary, an  
67 axis of nuclear small RNAs, H3K9 methylases, and HP1-like proteins contribute to heterochromatin  
68 formation and chromatin compaction in many eukaryotes.

69 siRNAs direct H3K9me3 in *C. elegans*<sup>29</sup>. To do so, cytoplasmic siRNAs engage AGO proteins  
70 (HRDE-1 in the germline; NRDE-3 in the soma), which escort siRNAs into nuclei where they bind  
71 nascent transcripts (pre-mRNA) and recruit the downstream nuclear RNAi effectors (NRDE-1/2/4) to  
72 genomic sites of RNAi<sup>29–32</sup>. Once recruited, the NRDEs inhibit RNAP II elongation and direct the  
73 deposition of H3K9me3 via a currently unknown histone methyltransferase(s)<sup>29</sup>. *C. elegans* express an  
74 abundant class of endogenous (endo) siRNAs, which engage the nuclear RNAi machinery to regulate  
75 gene expression and chromatin states (e.g. H3K9me3) during the normal course of growth and  
76 development<sup>29–33</sup>. *C. elegans* possess two HP1-like proteins HPL-1 and HPL-2<sup>34,35</sup>. HPL-2 is required  
77 for RNAi to direct long-term (transgenerational) gene silencing, which is a process known to depend  
78 upon the other components of the *C. elegans* nuclear RNAi machinery<sup>32,36,37</sup>. Thus, HPL-2 may be a  
79 downstream component of the nuclear RNAi machinery in *C. elegans*. Surprisingly, the relationship  
80 between HPL-2 and H3K9me3 in *C. elegans* is unclear; HPL-2 colocalizes with H3K9me3 on chromatin,  
81 however, HPL-2 is still largely able to localize to chromatin (albeit at attenuated levels) in mutant animals  
82 that lack detectable levels of H3K9me3<sup>38</sup>. Thus, other chromatin marks, in addition to H3K9me3, may  
83 contribute to HPL-2 localization in *C. elegans*. In plants, microchidia (MORC) GHKL ATPases are  
84 thought to act downstream of siRNAs and H3K9me3 to compact and silence chromatin surrounding

85 transposable elements<sup>39</sup>. The *C. elegans* genome encodes a single MORC-like protein (MORC-1)<sup>39</sup>. A  
86 recent study showed that MORC-1 is a downstream component of the *C. elegans* nuclear RNAi  
87 machinery<sup>40</sup>. Interestingly, in *C. elegans* lacking MORC-1, germ cell chromatin becomes disorganized  
88 and decompacted<sup>40</sup>). The data suggest that endo siRNAs, acting via the nuclear RNAi machinery, may  
89 contribute to chromatin compaction in the *C. elegans* germline.

90 Here we show that two additional components of the *C. elegans* nuclear RNAi machinery are  
91 required for normal chromatin compaction and chromatin organization in the germline, supporting the  
92 model that endo siRNAs regulate chromatin compaction in *C. elegans*. In addition, we show that siRNAs  
93 are sufficient to direct chromatin compaction in the soma and that this process requires a nuclear RNAi  
94 Ago (NRDE-3) as well as the HP1-like factor HPL-2. Our results support a model in which nuclear-  
95 localized small regulatory RNAs are important mediators of chromatin organization and compaction in *C.*  
96 *elegans*.

97

98

99

100

101

102

103

104

105

106

107

108

109

110 **Results:**

111 **Endogenous siRNAs may compact germline chromatin.** Small regulatory RNAs, such as  
112 siRNAs or piRNAs, have been linked to heterochromatin formation in many eukaryotes, suggesting that  
113 small RNAs may act as specificity factors, via Watson-Crick base pairing, for directing heterochromatin  
114 formation and chromatin compaction in many eukaryotes<sup>27</sup>. In addition, the GHKL ATPase MORC-1, a  
115 downstream component of the *C. elegans* nuclear RNAi machinery, promotes chromatin organization  
116 and chromatin compaction in adult *C. elegans* germ cells, suggesting that siRNAs, acting via the nuclear  
117 RNAi machinery and MORC-1, also regulate chromatin compaction in *C. elegans*<sup>40</sup>. To test this idea,  
118 we asked if two additional components of the *C. elegans* nuclear RNAi machinery: the germline  
119 expressed nuclear RNAi AGO HRDE-1, and the nuclear RNAi factor NRDE-2, were, like MORC-1,  
120 needed for chromatin organization and compaction in adult *C. elegans* germ cells. To do so, we used  
121 fluorescence microscopy to visualize a GFP::H2B chromatin marker in wild-type or *hrde-1(-)* and *nrde-*  
122 *2(-)* animals. [Note, it takes 2-3 generations of growth at elevated temperatures (25°C) for chromatin  
123 organization defects to be observed in *morc-1(-)* animals<sup>40</sup>. The reason for this is not known, but may  
124 be linked to the role of nuclear RNAi in transgenerational epigenetic gene regulation in the *C. elegans*  
125 germline<sup>32</sup>.] GFP::H2B was monitored over the course of three generations in animals grown at 25°C  
126 (Fig. 1A/B). In the first generation of growth at 25°C, germ cell nuclei of wild-type, *hrde-1 (-)*, and *nrde-*  
127 *2(-)* animals appeared similar (Fig. 1A/B). After three generations of growth at 25°C, however, GFP::H2B  
128 marked chromatin in *hrde-1 (-)* or *nrde-2(-)* germ cells became disorganized and GFP::H2B signals  
129 appeared enlarged (Fig. 1A and Movie 1). We measured the diameter of GFP::H2B fluorescence in  
130 randomly chosen nuclei and confirmed that GFP::H2B occupied more space in *hrde-1(-)* or *nrde-2(-)*  
131 animals than in wild-type animals after three generations of growth at 25°C (Fig. 1B). Increases in the  
132 amount of space occupied by chromatin in *hrde-1(-)* or *nrde-2(-)* animals could be due to decompaction  
133 of chromatin or, conceivably, an increase in DNA content. To distinguish between these possibilities, we  
134 quantified DAPI fluorescence (see materials and methods) in wild type or *nrde-2(-)* animals after three  
135 generations of growth at 25°C. The analysis indicated that wild-type and *nrde-2(-)* nuclei stained with  
136 similar amounts of DAPI, suggesting that the increased size of chromatin in *hrde-1(-)* or *nrde-2(-)* nuclei  
137 is due to decompaction and not increased DNA content (Fig. S1). The data suggest that germline

138 chromatin becomes disorganized and decompacted in animals lacking the nuclear RNAi factors NRDE-2  
139 and HRDE-1. We used whole chromosome DNA fluorescent *in situ* hybridization (FISH) to test this idea  
140 further. We subjected wild-type and *nrde-2(-)* animals, grown at 25°C for three generations, to whole  
141 chromosome DNA FISH targeting chromosomes I, II, and III (See Fields et al bioRxiv 2018 for details on  
142 chromosome-level DNA FISH). As expected, chromosome I, II, and III DNA FISH stained three distinct  
143 regions of subnuclear space, which were concentrated near the nuclear periphery, a pattern consistent  
144 with the expected localization of chromosomes in adult pachytene germ cell nuclei (Fig. 1C)<sup>41</sup>. In *nrde-*  
145 *2(-)* animals, chromosomes I, II, and III DNA FISH signals appeared disorganized and appeared to  
146 occupy more space than in wild-type animals (Fig. 1C). We used the Tools for Analysis of Nuclear  
147 Genome Organization (TANGO) software to quantify the amount of space occupied by DNA FISH  
148 signals in these animals and confirmed that each chromosome occupied more space in *nrde-2(-)*  
149 animals than in wild-type animals (Fig. 1D). We conclude that, similar to what has been seen for MORC-  
150 1, the nuclear RNAi AGO HRDE-1 and the downstream nuclear RNAi effector NRDE-2 prevent  
151 chromatin decompaction in germ cells of adult *C. elegans*.

152 **RNAi induces chromatin compaction in *C. elegans*.** Our data are consistent with the idea that  
153 endogenously expressed siRNAs promote chromatin organization and compaction in *C. elegans*. It is  
154 also possible that chromatin decompaction in *hrde-1(-)*, *nrde-2(-)*, or *morc-1(-)* animals could be an  
155 indirect consequence of the gene misregulation that occurs in animals lacking a functioning nuclear  
156 RNAi system<sup>32,42</sup>. To ask if small RNAs directly mediate chromatin compaction in *C. elegans*, we asked  
157 if experimental RNAi were sufficient to drive chromatin compaction. We targeted a large and repetitive  
158 multi-copy *sur-5::gfp* transgene, which expresses GFP in all somatic cells of *C. elegans*, with *gfp* RNAi  
159 and used *gfp* DNA FISH to visualize the space occupied by *gfp* DNA before and after *gfp* RNAi (Fig. 2A)  
160<sup>43,44</sup>. The repetitive *sur-5::gfp* transgene was chosen as its large size might be expected to make  
161 quantifications of size feasible. Similarly, we chose to image DNA FISH signals in intestinal cells as  
162 these cells are polyploid (32N), large, and easy to identify<sup>45</sup>. After *gfp* RNAi, the subnuclear space  
163 occupied by *sur-5::gfp* DNA appeared to decrease (Fig. 2A). Quantification confirmed that *gfp* RNAi  
164 caused *gfp* DNA FISH signals to occupy ~2 fold less space than in animals not exposed to *gfp* RNAi  
165 (Fig. 2B and Fig. S2). We conclude that RNAi can induce chromatin compaction in *C. elegans*.

166 **Nuclear RNAi couples siRNAs to chromatin compaction:** Nuclear RNAi in somatic tissues

167 requires the the somatically expressed AGO NRDE-3 and the conserved pre-mRNA binding protein  
168 NRDE-2<sup>29,30</sup>. To explore how RNAi mediates chromatin compaction, we asked if *nrde-2(-)* or *nrde-3(-)*  
169 animals were able to compact *sur-5::gfp* chromatin in response to *gfp* RNAi. We conducted *gfp* DNA  
170 FISH on *nrde-2(-);sur-5::gfp* and *nrde-3(-);sur-5::gfp* animals that were treated +/- with *gfp* RNAi and  
171 found that both NRDE-2 and NRDE-3 were required for RNAi-directed chromatin compaction (Fig.  
172 3A/B). Given that NRDE-3 is an AGO, the data support the idea that small RNAs are needed to mediate  
173 *sur-5::gfp* chromatin compaction. Given that NRDE-2 is a nuclear RNAi factor, the data support the idea  
174 that small RNAs engage the nuclear RNAi machinery to mediate chromatin compaction. In the absence  
175 of *gfp* RNAi the space occupied by the *sur-5::gfp* transgene was greater in *nrde-2(-)* and *nrde-3(-)* than  
176 in wild-type animals, suggesting that small RNA and nuclear RNAi-based *sur-5::gfp* compaction occurs  
177 at some level even in the absence of exogenous sources of *gfp* dsRNA (Fig. 3B). This latter observation  
178 is consistent with previous reports demonstrating that repetitive transgenes are often subjected to RNAi-  
179 based gene silencing in *C. elegans*<sup>46</sup>. How might siRNAs direct chromatin compaction? In many  
180 eukaryotes including *C. elegans*, RNAi directs H3K9me3 at genomic loci exhibiting sequence homology  
181 to RNAi triggers<sup>27</sup>. In addition, HP1-like proteins are recruited to H3K9me3 containing chromatin and  
182 homo-dimerize (or undergo phase separation) to compact chromatin by linking together distant sites of  
183 chromatin<sup>13,16,47</sup>. Finally, the HP1-like protein HPL-2 has been functionally linked to nuclear RNAi in *C.*  
184 *elegans*<sup>37</sup>. For all these reasons, we asked if HPL-2 might be required for RNAi-mediated chromatin  
185 compaction in *C. elegans*. *hpl-2(-)* animals failed to compact *sur-5::gfp* chromatin in response to *gfp*  
186 RNAi (Fig. 3B). The data are consistent with the idea that HP1-like proteins contribute to chromatin  
187 compaction directed by nuclear siRNAs in *C. elegans*.



193 **Discussion:**

194 Here we present evidence supporting the idea that endogenous siRNAs and the nuclear RNAi  
195 machinery can initiate/maintain chromatin architecture and compaction in *C. elegans* germ cells. We  
196 also show that experimentally introduced siRNAs are sufficient to compact chromatin in the soma and  
197 that this chromatin compaction requires a nuclear AGO as well as a downstream component of the  
198 nuclear RNAi machinery and the HP1-like protein HPL-2. The data support a model whereby nuclear  
199 small RNAs are important regulators of chromatin organization and chromatin compaction in *C. elegans*.

200 Our genetic analyses identified three factors (NRDE-2, NRDE-3, and HPL-2) that are required for  
201 RNAi-directed chromatin compaction in intestinal cells. These results have led us to propose the model  
202 summarized in Fig. 4. The AGOs NRDE-3 (soma) and HRDE-1 (germline) bind siRNAs and interacts  
203 with homologous nascent RNAs to recruit the NRDE nuclear RNAi factors to chromatin. The  
204 downstream nuclear RNAi factors (e.g. NRDE-2) recruit a currently unknown histone H3K9  
205 methyltransferase(s) to chromatin to deposit H3K9me3. Finally, H3K9me3 recruits the HP1-like protein  
206 HPL-2, which dimerizes to compact the chromatin (Fig. 4). Important tests of this model will include 1)  
207 asking if siRNAs are sufficient to direct chromatin compaction in germ cells, 2) asking if HPL-2 is  
208 physically recruited to sites of nuclear RNAi, 3) asking if HPL-2 dimerization is necessary for RNAi-  
209 based chromatin compaction, and 4) asking if H3K9me3 (directed by nuclear RNAi) is needed for  
210 recruitment of HPL-2 to chromatin. Regarding this latter question, three SET domain proteins (SET-25,  
211 MET-2, and SET-32/HRDE-3) have been linked to H3K9 methylation in *C. elegans* and are redundantly  
212 required for RNAi directed H3K9me3<sup>48-50</sup>. Potential roles for H3K9me3 in HPL-2 recruitment and/ or  
213 chromatin compaction could be addressed by asking if animals lacking all three of methyltransferases  
214 are defective for small RNA-directed chromatin compaction. Interestingly, in *C. elegans*, localization of  
215 HPL-2 to chromatin is only partially dependent upon H3K9me3, suggesting that *C. elegans* may possess  
216 H3K9me3-independent systems for recruiting HPL-2 to chromatin<sup>38</sup>. Indeed, *in vitro* studies show that  
217 *C. elegans* HPL-2 binds H3K27me3 (as well as H3K9me3) and *in vivo* studies show that RNAi directs  
218 the deposition of H3K27me3 on chromatin (as well as H3K9me3) in *C. elegans*<sup>51,52</sup>. Thus, H3K27me3  
219 may act in parallel with, or independently of, H3K9me3 during HPL-2 driven chromatin compaction.

220 Studies asking if components of the *C. elegans* Polymcomb 2 complex are needed for RNAi-directed  
221 chromatin compaction could test this model. Finally, the GHKL ATPase MORC-1 has been linked to  
222 chromatin compaction in plants and in *C. elegans* germ cells<sup>39,40</sup>. These observations have led to a  
223 model in which MORC-1 compacts chromatin at the direction of small RNAs. The chromatin compaction  
224 system described here will allow the role of MORC-1 in somatic chromatin compaction to be assessed.

225 Many eukaryotes express a diverse array of small regulatory RNAs. These RNAs are mobile and  
226 have the ability to interact with a high degree of specificity with other cellular nucleic acids. Such traits  
227 make small regulatory RNAs excellent candidates to be precise yet versatile vectors of chromatin  
228 compaction during reproduction and development. What biological function(s) might small RNA-directed  
229 chromatin compaction play during reproduction and development? The simplest answer might be that  
230 small RNA-directed chromatin compaction regulates gene expression programs by regulating  
231 accessibility of chromatin to the transcriptional machinery. Consistent with this idea, the nuclear RNAi  
232 factors that we have linked to chromatin compaction in this work, are known to regulate gene expression  
233 in *C. elegans*<sup>29,30,32,42</sup>. Asking if nuclear RNAi-regulated genes are bound by HPL-2 (and if this binding  
234 requires nuclear RNAi factors) would be a good test of this idea. Interestingly, many of the loci regulated  
235 by nuclear RNAi are not protein-coding genes; rather, they are cryptic loci or pseudogenes<sup>32,42</sup>. Thus,  
236 gene regulation may not be the sole biological output for small RNA-mediated chromatin compaction. It  
237 is possible that small RNA-directed chromatin compaction could also be used to help generate higher-  
238 order chromatin structures underlying chromosome segregation during mitosis or meiosis. Consistent  
239 with this latter idea, mutations in several *C. elegans* RNAi factors (including HRDE-1 and NRDE-2) have  
240 been linked to chromosomal nondisjunction during meiosis<sup>53-62</sup>. Centromeres are compacted  
241 chromosomal structures needed for chromosome segregation during mitosis and meiosis. *C. elegans*  
242 are holocentric; centromere function is dispersed across hundreds of point centromeres on each  
243 chromosome<sup>63</sup>. Nonetheless, like centromeres in other eukaryotes, *C. elegans* point centromeres are  
244 flanked by chromatin containing H3K9me3 and HP1 (termed pericentromeres) and this flanking  
245 heterochromatin is important for centromere function<sup>38,64,65</sup>. Therefore, it is possible that small RNA-  
246 directed HPL-2 recruitment and, therefore, chromatin compaction, may contribute to holocentromere

247 function in *C. elegans*, an idea that could be tested by asking if the localization of HPL-2 to  
248 pericentromeres depends upon nuclear small RNAs.

249

250

251

252 **Figures and Legends:**

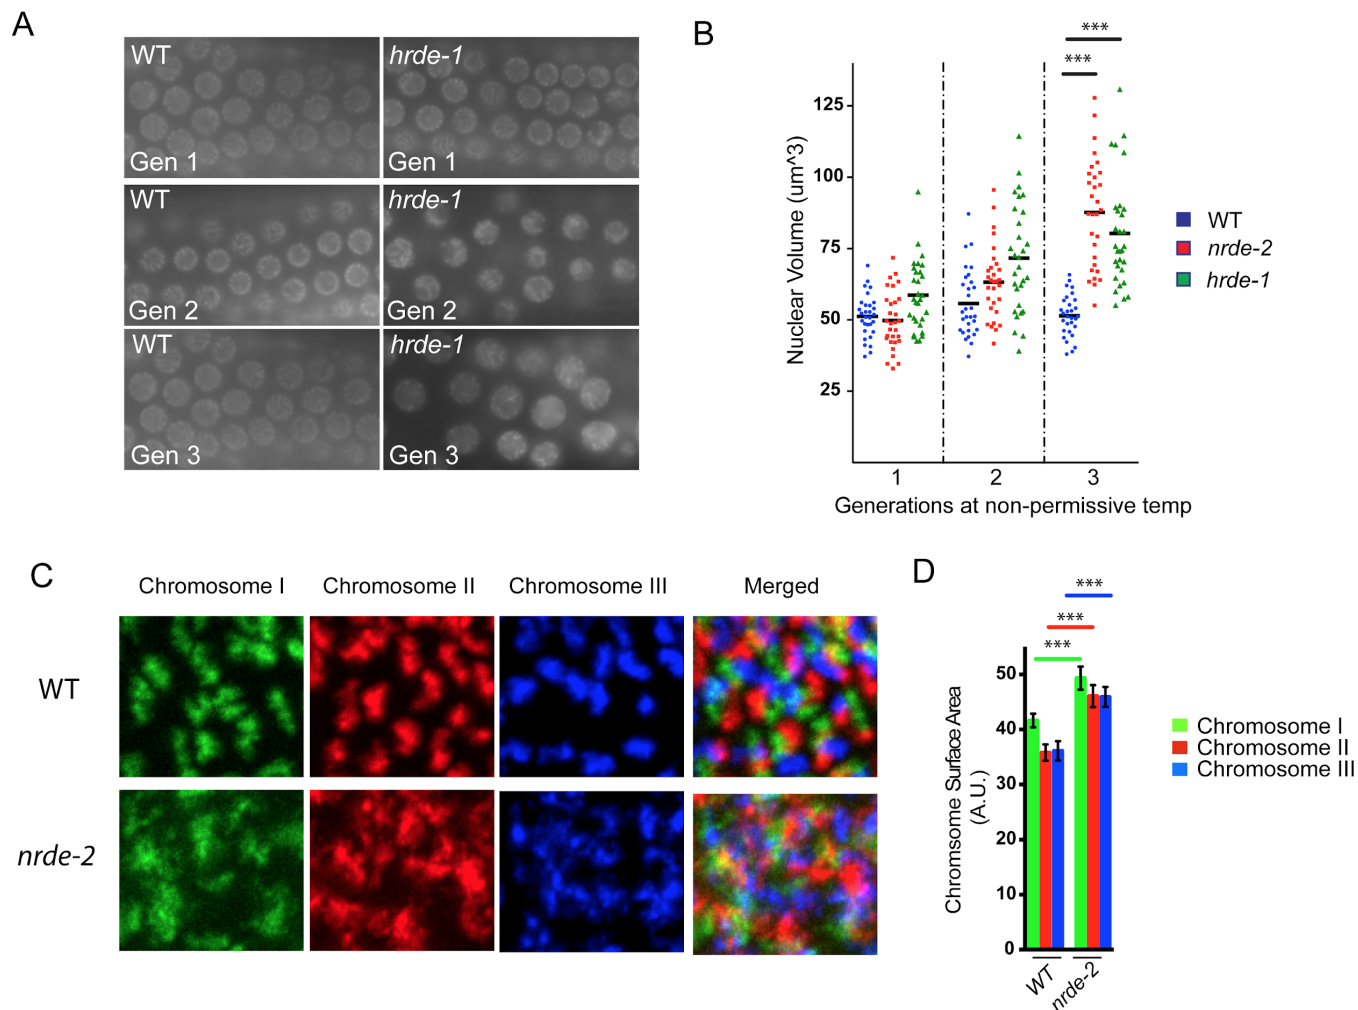

253 **Figure 1. Endogenous siRNAs compact chromatin in *C. elegans*.** **A.** Fluorescent micrograph of  
 254 pachytene germ cells of animals expressing a *gfp::h2b* transgene in the germline as an *in vivo* readout of  
 255 chromatin structure. Wild type or *hrde-1(tm1200)* animals were maintained at 25°C and imaged over three  
 256 generations. **B.** Diameter of nuclei in randomly chosen germ cells from panel A were measured (see  
 257 materials and methods for details) to quantify the nuclear volume of GFP::H2B in wild type, *nrde-2(gg091)*,  
 258 and *hrde-1 (tm1200)* animals maintained at 25°C across 3 generations. **C.** DNA FISH staining of  
 259 chromosomes I, II and III in pachytene germ cells of wild type and *nrde-2(gg091)* animals that were  
 260 maintained at 25°C for 3 generations. **D.** TANGO-based quantification of randomly chosen germ cells from  
 261 panel C (see materials and methods for details) of chromosomal surface areas for wild type and *nrde-*  
 262 *2(gg091)* animals maintained at 25°C for 3 generations. p-values were calculated using a student's two-  
 263 tailed T test. \*\*\* = p-value <0.005

264

265

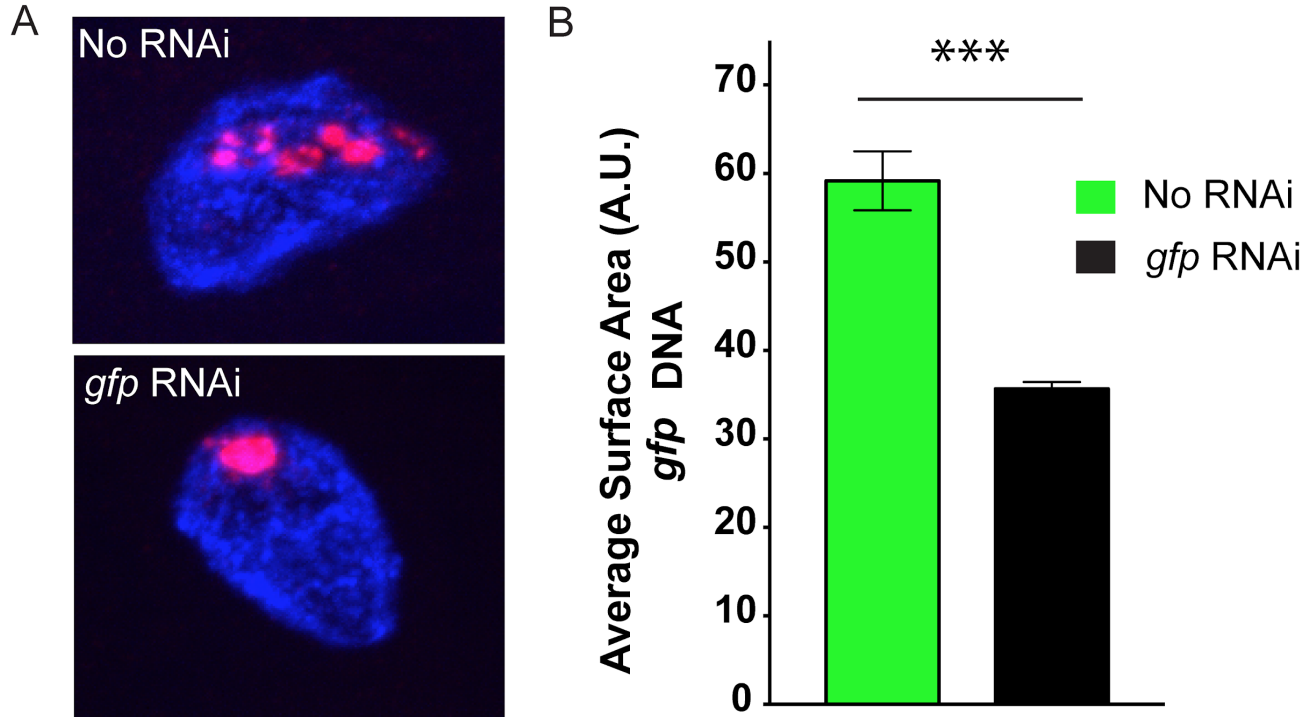

266

267

268 **Figure 2. dsRNA induces chromatin compaction in *C. elegans*.** **A.** Fluorescent micrographs of a  
269 single *C. elegans* intestinal nucleus possessing a multicopy *sur-5::gfp* transgene stained with DNA FISH  
270 probes targeting *gfp* DNA (red), and DAPI (blue). Representative images of animals grown in the  
271 presence (bottom) or absence (top) of *gfp* dsRNA. **B.** Surface area calculations for *gfp* DNA FISH  
272 signals in animals grown in the presence (right) or absence (left) of *gfp* dsRNA. p-value was calculated  
273 using a student's two tailed t-test. \*\*\* = p-value <0.005

274

275

276

277

278

279

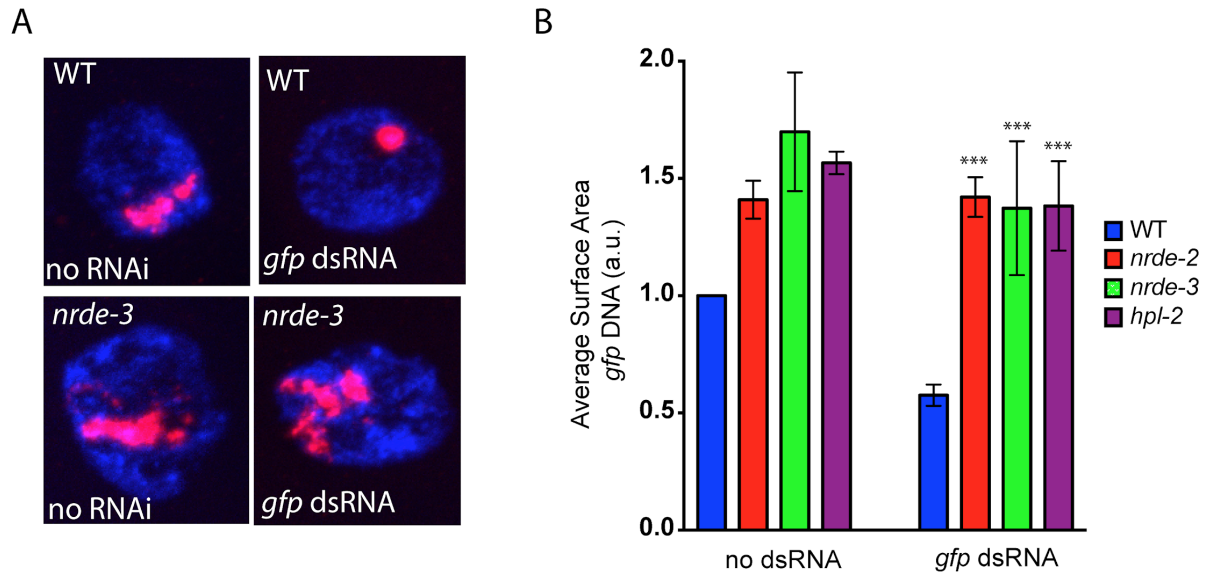

280 **Figure 3. Nuclear RNAi and HPL-2 are needed for RNAi-directed chromatin compaction. A.**  
281 Fluorescent micrographs of intestinal nuclei from animals possessing a multicopy *sur-5::gfp* transgene  
282 stained with DNA FISH probes targeting *gfp* DNA (red) and DAPI (blue) in wild type or *nrde-3(gg066)*  
283 mutant animals exposed to no RNAi (left) or *gfp* RNAi (right). **B.** Surface area calculations of *gfp* DNA of  
284 intestinal nuclei from wild type, *nrde-2(gg091)*, *nrde-3(gg066)*, and *hpl-2(tm1489)* animals, which all  
285 express the *sur-5p::gfp* transgene, and which were grown in the presence or absence of *gfp* RNAi. Data  
286 is normalized to the WT (no RNAi) control for each condition to account for differences in hybridization  
287 efficiency across experiments. p-values were calculated using a student's two tailed t-test and were  
288 calculated with respect to wild type samples feeding on *gfp* RNAi. \*\*\*=p-value <0.005. n.s.=not  
289 significant.

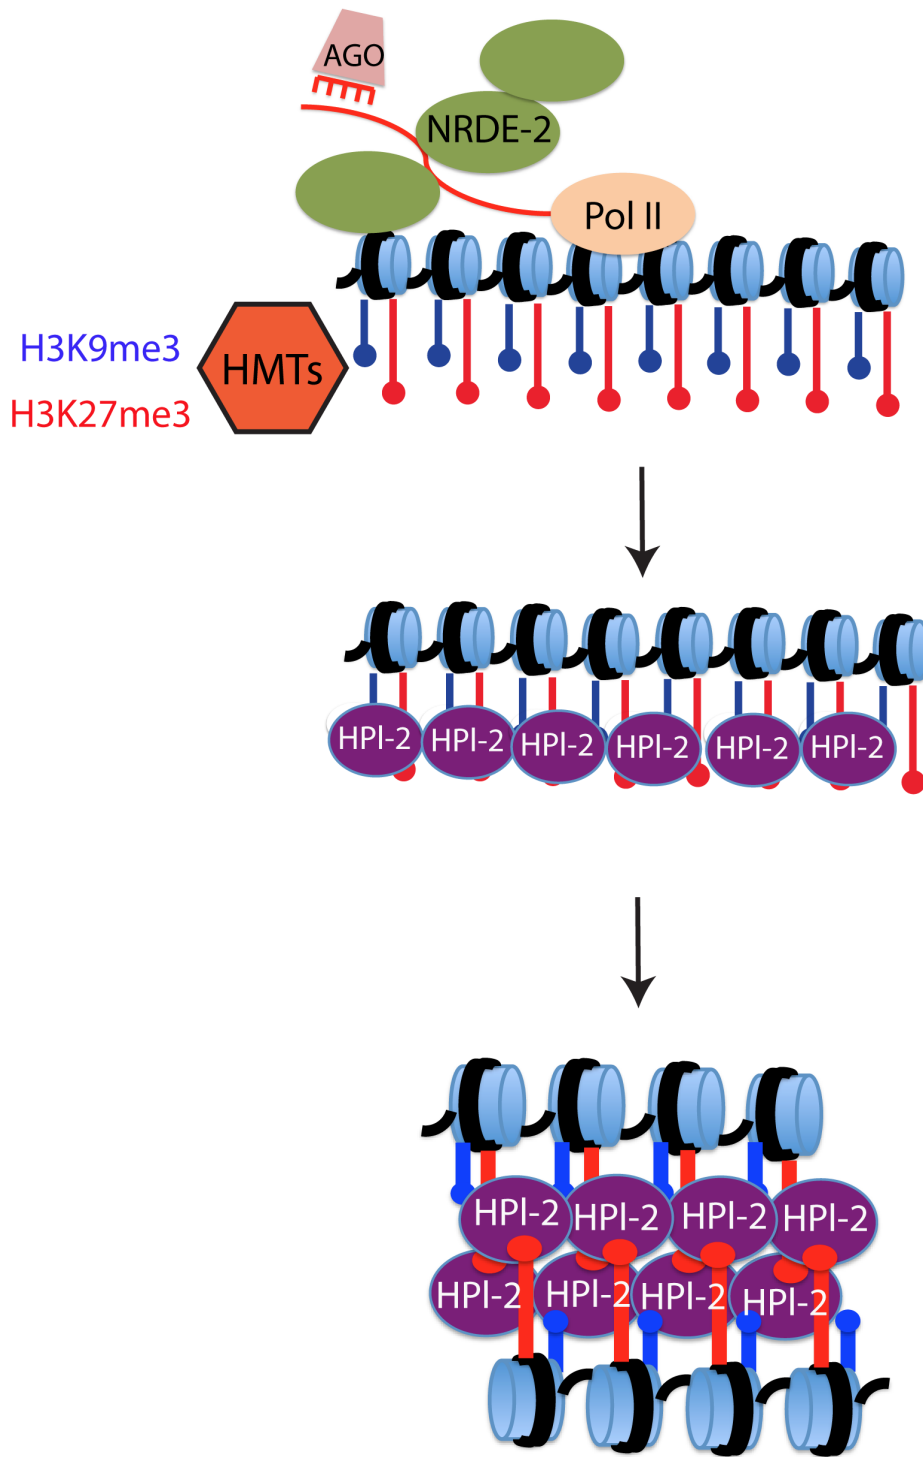

296 **Figure 4. Model for small RNA directed chromatin compaction in *C. elegans*.**

297

298

299

300

301

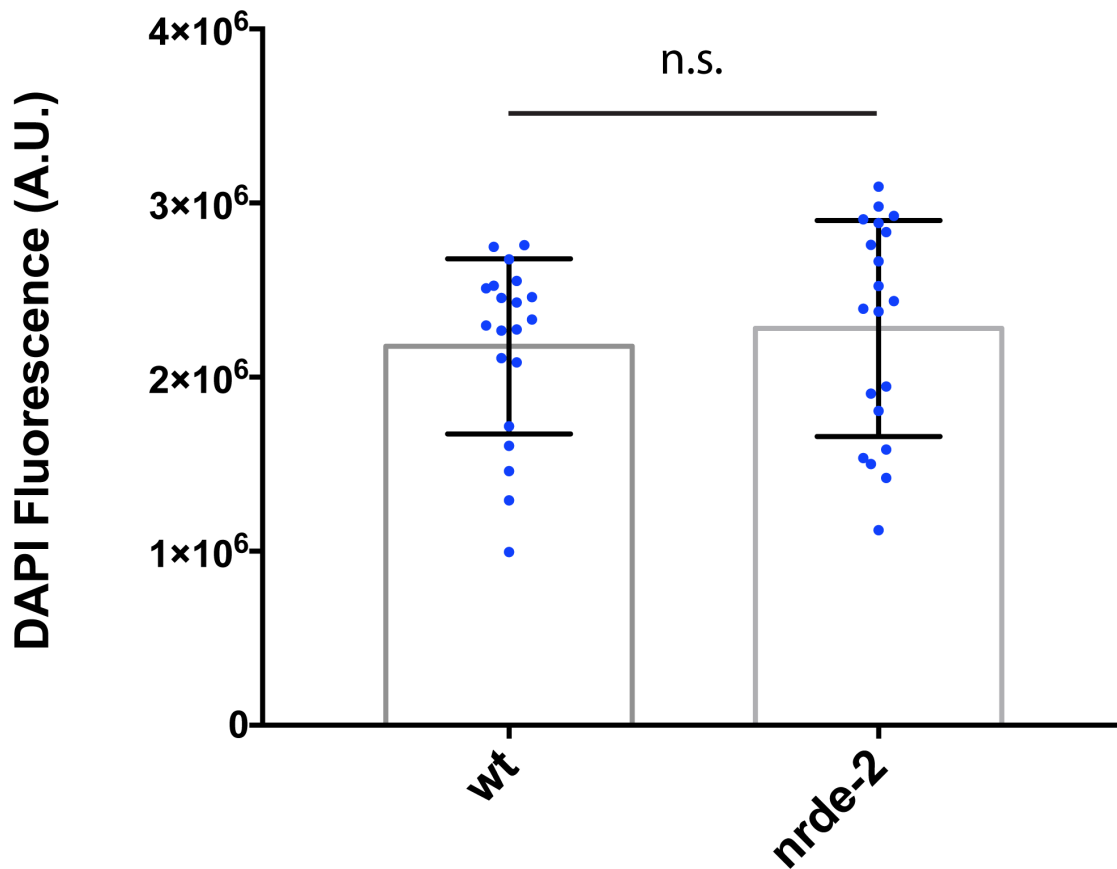

302

303

**Supplementary Figure 1. Wild-type and late generation *nrde-2(-)* nuclei possess a similar amount of DNA.** Fluorescent intensity measurements were made from individual germ cells of wild type and *nrde-2(gg091)* animals grown at 25°C for three generations. Each data point represents one germ cell nuclei. Data points were collected from four different animals per genotype. p-value was calculated using a student's two tailed t-test. n.s. = not significant.

307

308

309

310

311

312

313



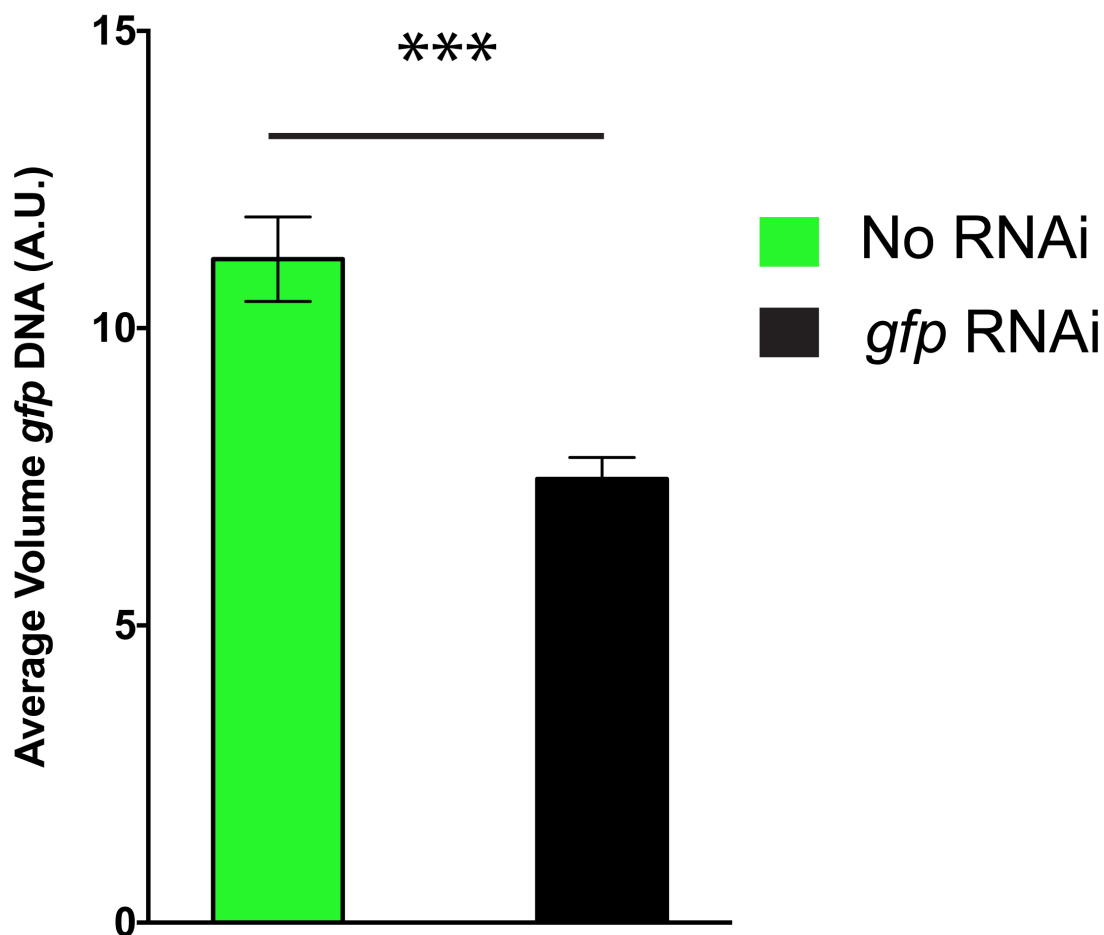

314  
315 **Supplementary Figure 2. Volume quantifications of the *sur-5::gfp* transgene.** Volume  
316 quantifications for animals feeding on *gfp* RNAi (right) or no RNAi (left). p-value was calculated using a  
317 student's two tailed t-test. \*\*\* = p-value <0.005.

318  
319  
320 **Movie 1. 3D reconstructions of GFP::H2B in wild type versus *nrde-2(-)* mutant animals.** 3D  
321 reconstructions of confocal Z-slices for wild type and *nrde-2(gg091)* animals expressing a *gfp::h2b*  
322 reporter in the germline and maintained at 25°C for three generations. Z-slices were gathered at 0.3 um  
323 intervals. 3D reconstructions were generated using Nikon Imaging software.

324

325

326

327 **Materials and Methods.**

328

329 **Strains:** N2, MH1870 (*kuls54*), YY519 (*nrde-2(gg091); kuls54*), YY520 (*nrde-3(gg066); kuls54*), YY528  
330 (*hrde-1 (tm1220); pkls32*), YY1704 (*nrde-2 (gg091); pkls32*), YY502 (*nrde-2(gg091)*), YY1363 (*hpl-2*  
331 (*tm1489*), *kuls54*).

332

333 **Sample collection for DNA FISH:** Embryos were isolated by hypochlorite treatment and placed on 10  
334 cm plates seeded with OP50 bacteria, or for RNAi experiments HT115 bacteria expressing *gfp* dsRNA  
335 or no dsRNA. When animals reached adulthood, plates were washed with M9 solution and collected in  
336 15 ml conical tubes. Animals were pelleted (3k rpm for 30 seconds), and washed 2 times with M9  
337 solution. Animals were resuspended in 10 ml of M9 solution and rocked for ~30 min at room  
338 temperature. Animals were pelleted and aliquoted to 1.5 ml microcentrifuge tubes (40 ul of packed  
339 worms per tube). Samples were placed in liquid nitrogen for 1 minute and stored at -80C.

340

341 **DNA FISH probe preparation:** Genomic DNA was isolated from animals expressing *kuls54 (Psur-*  
342 *5::sur-5::gfp)*. PCR was done to amplify the *gfp* sequence, and 2 ug of *gfp* DNA was used as starting  
343 material for FISH probe synthesis. The FISH Tag DNA Kit from Life Science Technologies (cat. number  
344 F32948) was used and the protocol suggested by the manufacturer was followed. Exceptions to the  
345 manufacturer's protocol were the amount of starting material (2 ug used) and resuspension volume (20  
346 ul). Probes were stored at -20C in the dark and used within 2 weeks of synthesis.

347

348 ***gfp* DNA FISH:** Frozen worm pellets were resuspended in cold 95% ethanol and vortexed for 30  
349 seconds. Samples were rocked for 10 minutes at room temperature. Samples were spun down (3k rpm  
350 for 30 seconds) and supernatant discarded. Samples were washed twice in 1X PBST. 1 ml of 4%  
351 paraformaldehyde solution was added and samples were rocked at room temperature for 5 minutes.  
352 Samples were then washed twice with 1X PBST before resuspension in 2XSSC for 5 minutes at room  
353 temperature. Samples were spun down and resuspended in a 50% formamide 2XSSC solution at room  
354 temperature for 5 minutes, 95°C for 3 minutes, and 60°C for 20 minutes. Samples were spun and

355 resuspended in 60 ul of hybridization mixture (10% dextran sulfate, 2XSSC, 50% formamide, 2 ul of *gfp*  
356 FISH probe and 2 ul of RNAse A (sigma 20 mg/ml)). Hybridization reactions were incubated at 95°C for  
357 5 minutes before overnight incubation at 37°C in a hybridization oven. The next day, samples were  
358 washed with 50% formamide 2XSSCT (rotating at 37°C) for 30 minutes. Wash buffer was removed and  
359 samples were resuspended in mounting medium (vectashield with DAPI). Samples were mounted on  
360 microscope slides and sealed with nail polish.

361

362 **Oligopaint DNA FISH:** For Oligopaint staining, the same DNA FISH protocol was used with the  
363 following exceptions. In the hybridization mixture, 100 pmol of oligo was used for each chromosome.  
364 The following day, samples were washed with 50% formamide 2XSSCT at 37C for 30 minutes. Wash  
365 buffer was removed, and samples were resuspended in in 60 ul of hybridization mixture (10% dextran  
366 sulfate, 2XSSC, 50% formamide, and 100 pmol of bridge oligo for each chromosome). Samples were  
367 incubated at 37C for 45 minutes. Samples were washed with 50% formamide 2XSSCT at 37C for 30  
368 minutes. Wash buffer was removed, and samples were resuspended in 60 ul of hybridization mixture  
369 (10% dextran sulfate, 2XSSC, 50% formamide, and 100 pmol of detection oligo (labeled with Alexa 488,  
370 cy3, or Alexa647) for each chromosome). Samples were incubated at 37C for 45 minutes. Samples  
371 were washed with 50% formamide 2XSSCT at 37C for 30 minutes. Wash buffer was removed, and  
372 samples were resuspended in 50 ul of slowfade gold with DAPI.

373

374 **DAPI staining alone:** Frozen worm pellets were resuspended in 1 ml of cold methanol (-20C). Samples  
375 were rocked for 15 minutes at room temperature. Samples were washed twice with 1XPBST, and  
376 resuspended in 75 ul of vectashield with DAPI.

377

378 **Microscopy:** DNA FISH images were captured by standard fluorescent microscopy using a widefield  
379 Zeiss Axio Observer.Z1 microscope using a Plan-Apochromat 63X/1.40 Oil DIC M27 objective and an  
380 ORCA-Flash 4.0 CMOS Camera. The Zeiss Apotome 2.0 was used for structured illumination  
381 microscopy using 3 phase images for DNA FISH imaging. For each animal imaged, the exposure time  
382 was set to fill 35% of the camera's dynamic range to account for differences in hybridization efficiency

383 between animals. For intestinal nuclei, all images were taken at the anterior end of the worm to ensure  
384 we were imaging the same set of nuclei across all images. All image processing was done using the Zen  
385 imaging software from Zeiss. For *in vivo* imaging of GFP::H2B, animals were immobilized in M9 with  
386 0.1% Sodium Azide. Animals were imaged immediately with the Zeiss Axio system described above.  
387 Confocal imaging (Movie 1) was done using a Nikon Eclipse Ti microscope equipped with a W1  
388 Yokogawa Spinning disk with 50 um pinhole disk and an Andor Zyla 4.2 Plus sCMOS monochrome  
389 camera. A 60X/1.4 Plan Apo Oil objective was used.

390  
391 **Quantification of space occupied by GFP::H2B:** To measure volume of H2B::GFP signals in Fig. 1B,  
392 nuclear diameters were measured using the Zeiss Zen software on randomly selected nuclei located in  
393 a similar region of the germline (close to gonad turn, pachytene). Nuclear volumes were calculated  
394 assuming spherical shape.

395  
396 **Quantification of space occupied by DNA FISH signals:** The Tools for Analysis of Nuclear Genome  
397 Organization (TANGO) software was used to quantify the surface area and/or volume of space occupied  
398 by DNA FISH signals (*gfp* DNA FISH and whole chromosome DNA FISH<sup>66</sup>). For *gfp* DNA FISH analysis  
399 in intestinal nuclei, the standard nucleus segmentation processing chain was used with the following  
400 modifications: Nucleus edge detector, minimum nucleus size = 15,000. Size and edge filter, minimum  
401 nucleus size = 15,000. For object (*gfp* DNA FISH signal) segmentation the nucleoli processing chain  
402 was used with the following modification: Size and edge filter, minimum volume = 3. For whole  
403 chromosome DNA FISH quantifications, the standard nucleus segmentation processing strain was used  
404 with the following modifications: Nucleus edge detector, minimum nucleus size = 100. Size and edge  
405 filter, minimum nucleus size = 100. The nucleoli processing chain was used to segment chromosome  
406 structures with the following modifications: Size and edge filter, minimum volume = 3.

407  
408 **DAPI quantifications:** As a readout of DNA quantity we quantified DAPI fluorescence using ImageJ.  
409 Regions of interest (ROI), were generated for five germ cell nuclei per worm, and z-slices were selected  
410 to encompass the entire nucleus. The multi-measure tool in ImageJ was used to measure total

fluorescence within the ROI for each slice. Three ROIs were drawn outside the worm to gain an average background level. Background levels were subtracted from each nucleus by multiplying the area of the ROI for a given nucleus with the average background value for the image.

### **Competing interests**

The author(s) declare no competing interests.

### **Data availability**

All data generated or analysed during this study are included in this published article (and its Supplementary Information files).

### **Author Contributions**

B.D.F generated all data. B.D.F and S.K. wrote the paper

135

136

137

138 **References:**

- 139 1. Antonin, W. & Neumann, H. Chromosome condensation and decondensation during mitosis.  
140 *Curr. Opin. Cell Biol.* **40**, 15–22 (2016).
- 141 2. Hirano, T. Condensin-Based Chromosome Organization from Bacteria to Vertebrates. *Cell* **164**,  
142 847–857 (2016).
- 143 3. Francis, N. J., Kingston, R. E. & Woodcock, C. L. Chromatin compaction by a polycomb group  
144 protein complex. *Science* **306**, 1574–1577 (2004).
- 145 4. Boettiger, A. N. *et al.* Super-resolution imaging reveals distinct chromatin folding for different  
146 epigenetic states. *Nature* **529**, 418 (2016).
- 147 5. James, T. C. & Elgin, S. C. Identification of a nonhistone chromosomal protein associated with  
148 heterochromatin in *Drosophila melanogaster* and its gene. *Mol. Cell. Biol.* **6**, 3862–3872 (1986).
- 149 6. James, T. C. *et al.* Distribution patterns of HP1, a heterochromatin-associated nonhistone  
150 chromosomal protein of *Drosophila*. *Eur. J. Cell Biol.* **50**, 170–180 (1989).
- 151 7. Eissenberg, J. C. *et al.* Mutation in a heterochromatin-specific chromosomal protein is associated  
152 with suppression of position-effect variegation in *Drosophila melanogaster*. *Proc. Natl. Acad. Sci.*  
153 *U. S. A.* **87**, 9923–9927 (1990).
- 154 8. Eissenberg, J. C., Morris, G. D., Reuter, G. & Hartnett, T. The heterochromatin-associated  
155 protein HP-1 is an essential protein in *Drosophila* with dosage-dependent effects on position-  
156 effect variegation. *Genetics* **131**, 345–352 (1992).
- 157 9. Li, Y., Danzer, J. R., Alvarez, P., Belmont, A. S. & Wallrath, L. L. Effects of tethering HP1 to  
158 euchromatic regions of the *Drosophila* genome. *Development* **130**, 1817–1824 (2003).
- 159 10. Verschure, P. J. *et al.* In vivo HP1 targeting causes large-scale chromatin condensation and  
160 enhanced histone lysine methylation. *Mol. Cell. Biol.* **25**, 4552–4564 (2005).
- 161 11. Paro, R. & Hogness, D. S. The Polycomb protein shares a homologous domain with a

- 162 heterochromatin-associated protein of *Drosophila*. *Proc. Natl. Acad. Sci. U. S. A.* **88**, 263–267  
163 (1991).
- 164 12. Aasland, R. & Stewart, A. F. The chromo shadow domain, a second chromo domain in  
165 heterochromatin-binding protein 1, HP1. *Nucleic Acids Res.* **23**, 3168–3173 (1995).
- 166 13. Bannister, A. J. *et al.* Selective recognition of methylated lysine 9 on histone H3 by the HP1  
167 chromo domain. *Nature* **410**, 120–124 (2001).
- 168 14. Cowieson, N. P., Partridge, J. F., Allshire, R. C. & McLaughlin, P. J. Dimerisation of a chromo  
169 shadow domain and distinctions from the chromodomain as revealed by structural analysis. *Curr.*  
170 *Biol.* **10**, 517–525 (2000).
- 171 15. Canzio, D. *et al.* A conformational switch in HP1 releases auto-inhibition to drive heterochromatin  
172 assembly. *Nature* **496**, 377–381 (2013).
- 173 16. Hiragami-Hamada, K. *et al.* Dynamic and flexible H3K9me3 bridging via HP1 $\beta$  dimerization  
174 establishes a plastic state of condensed chromatin. *Nat. Commun.* **7**, 11310 (2016).
- 175 17. Bernstein, E., Caudy, A. A., Hammond, S. M. & Hannon, G. J. Role for a bidentate ribonuclease  
176 in the initiation step of RNA interference. *Nature* **409**, 363–366 (2001).
- 177 18. Holoch, D. & Moazed, D. RNA-mediated epigenetic regulation of gene expression. *Nat. Rev.*  
178 *Genet.* **16**, 71–84 (2015).
- 179 19. Locke, S. & Martienssen, R. Epigenetic Silencing of Pericentromeric Heterochromatin by RNA  
180 Interference in *Schizosaccharomyces pombe*. in *Epigenomics* (eds. Ferguson-Smith, A. C.,  
181 Gready, J. M. & Martienssen, R. A.) 149–162 (Springer Netherlands, 2009).
- 182 20. Nakayama, J., Rice, J. C., Strahl, B. D., Allis, C. D. & Grewal, S. I. Role of histone H3 lysine 9  
183 methylation in epigenetic control of heterochromatin assembly. *Science* **292**, 110–113 (2001).
- 184 21. Volpe, T. A. *et al.* Regulation of heterochromatic silencing and histone H3 lysine-9 methylation by  
185 RNAi. *Science* **297**, 1833–1837 (2002).
- 186 22. Hall, I. M. *et al.* Establishment and maintenance of a heterochromatin domain. *Science* **297**,  
187 2232–2237 (2002).
- 188 23. Noma, K.-I. *et al.* RITS acts in cis to promote RNA interference-mediated transcriptional and  
189 post-transcriptional silencing. *Nat. Genet.* **36**, 1174–1180 (2004).

- 190 24. Sugiyama, T., Cam, H., Verdel, A., Moazed, D. & Grewal, S. I. S. RNA-dependent RNA  
191 polymerase is an essential component of a self-enforcing loop coupling heterochromatin  
192 assembly to siRNA production. *Proc. Natl. Acad. Sci. U. S. A.* **102**, 152–157 (2005).
- 193 25. Motamedi, M. R. *et al.* HP1 proteins form distinct complexes and mediate heterochromatic gene  
194 silencing by nonoverlapping mechanisms. *Mol. Cell* **32**, 778–790 (2008).
- 195 26. Saksouk, N., Simboeck, E. & Déjardin, J. Constitutive heterochromatin formation and  
196 transcription in mammals. *Epigenetics Chromatin* **8**, 3 (2015).
- 197 27. Martienssen, R. & Moazed, D. RNAi and heterochromatin assembly. *Cold Spring Harb. Perspect.*  
198 *Biol.* **7**, a019323 (2015).
- 199 28. Czech, B. & Hannon, G. J. One Loop to Rule Them All: The Ping-Pong Cycle and piRNA-Guided  
500 Silencing. *Trends Biochem. Sci.* **41**, 324–337 (2016).
- 501 29. Guang, S. *et al.* Small regulatory RNAs inhibit RNA polymerase II during the elongation phase of  
502 transcription. *Nature* **465**, 1097–1101 (2010).
- 503 30. Guang, S. *et al.* An Argonaute transports siRNAs from the cytoplasm to the nucleus. *Science*  
504 **321**, 537–541 (2008).
- 505 31. Burkhardt, K. B. *et al.* A pre-mRNA-associating factor links endogenous siRNAs to chromatin  
506 regulation. *PLoS Genet.* **7**, e1002249 (2011).
- 507 32. Buckley, B. A. *et al.* A nuclear Argonaute promotes multigenerational epigenetic inheritance and  
508 germline immortality. *Nature* **489**, 447–451 (2012).
- 509 33. Billi, A. C., Fischer, S. E. J. & Kim, J. K. Endogenous RNAi pathways in *C. elegans*. *WormBook*  
510 1–49 (2014).
- 511 34. Couteau, F., Guerry, F., Muller, F. & Palladino, F. A heterochromatin protein 1 homologue in  
512 *Caenorhabditis elegans* acts in germline and vulval development. *EMBO Rep.* **3**, 235–241  
513 (2002).
- 514 35. Schott, S., Coustham, V., Simonet, T., Bedet, C. & Palladino, F. Unique and redundant functions  
515 of *C. elegans* HP1 proteins in post-embryonic development. *Dev. Biol.* **298**, 176–187 (2006).
- 516 36. Vastenhouw, N. L. *et al.* Gene expression: long-term gene silencing by RNAi. *Nature* **442**, 882  
517 (2006).



- 518 37. Ashe, A. *et al.* piRNAs can trigger a multigenerational epigenetic memory in the germline of *C.*  
519 *elegans*. *Cell* **150**, 88–99 (2012).
- 520 38. Garrigues, J. M., Sidoli, S., Garcia, B. A. & Strome, S. Defining heterochromatin in *C. elegans*  
521 through genome-wide analysis of the heterochromatin protein 1 homolog HPL-2. *Genome Res.*  
522 **25**, 76–88 (2015).
- 523 39. Moissiard, G. *et al.* MORC family ATPases required for heterochromatin condensation and gene  
524 silencing. *Science* **336**, 1448–1451 (2012).
- 525 40. Weiser, N. E. *et al.* MORC-1 Integrates Nuclear RNAi and Transgenerational Chromatin  
526 Architecture to Promote Germline Immortality. *Dev. Cell* **41**, 408–423.e7 (2017).
- 527 41. Goldstein, P. The synaptonemal complexes of *Caenorhabditis elegans*: pachytene karyotype  
528 analysis of male and hermaphrodite wild-type and him mutants. *Chromosoma* **86**, 577–593  
529 (1982).
- 530 42. Ni, J. Z., Chen, E. & Gu, S. G. Complex coding of endogenous siRNA, transcriptional silencing  
531 and H3K9 methylation on native targets of germline nuclear RNAi in *C. elegans*. *BMC Genomics*  
532 **15**, 1157 (2014).
- 533 43. Yochem, J., Gu, T. & Han, M. A new marker for mosaic analysis in *Caenorhabditis elegans*  
534 indicates a fusion between *hyp6* and *hyp7*, two major components of the hypodermis. *Genetics*  
535 **149**, 1323–1334 (1998).
- 536 44. Gu, T., Orita, S. & Han, M. *Caenorhabditis elegans* SUR-5, a novel but conserved protein,  
537 negatively regulates LET-60 Ras activity during vulval induction. *Mol. Cell. Biol.* **18**, 4556–4564  
538 (1998).
- 539 45. Hedgecock, E. M. & White, J. G. Polyploid tissues in the nematode *Caenorhabditis elegans*. *Dev.*  
540 *Biol.* **107**, 128–133 (1985).
- 541 46. Dernburg, A. F., Zalevsky, J., Colaiácovo, M. P. & Villeneuve, A. M. Transgene-mediated  
542 cosuppression in the *C. elegans* germ line. *Genes Dev.* **14**, 1578–1583 (2000).
- 543 47. Larson, A. G. *et al.* Liquid droplet formation by HP1 $\alpha$  suggests a role for phase separation in  
544 heterochromatin. *Nature* **547**, 236–240 (2017).
- 545 48. Towbin, B. D. *et al.* Step-wise methylation of histone H3K9 positions heterochromatin at the

- 546 nuclear periphery. *Cell* **150**, 934–947 (2012).
- 547 49. Spracklin, G. *et al.* The RNAi Inheritance Machinery of *Caenorhabditis elegans*. *Genetics* **206**,  
548 1403–1416 (2017).
- 549 50. Kalinava, N., Ni, J. Z., Peterman, K., Chen, E. & Gu, S. G. Decoupling the downstream effects of  
550 germline nuclear RNAi reveals that H3K9me3 is dispensable for heritable RNAi and the  
551 maintenance of endogenous siRNA-mediated transcriptional silencing in *Caenorhabditis elegans*.  
552 *Epigenetics Chromatin* **10**, 6 (2017).
- 553 51. Studencka, M. *et al.* Transcriptional Repression of Hox Genes by *C. elegans* HP1/HPL and  
554 H1/HIS-24. *PLoS Genet.* **8**, e1002940 (2012).
- 555 52. Mao, H. *et al.* The Nrde Pathway Mediates Small-RNA-Directed Histone H3 Lysine 27  
556 Trimethylation in *Caenorhabditis elegans*. *Curr. Biol.* **25**, 2398–2403 (2015).
- 557 53. Ketting, R. F., Haverkamp, T. H. A., van Luenen, H. G. A. M. & Plasterk, R. H. A. mut-7 of *C.*  
558 *elegans*, Required for Transposon Silencing and RNA Interference, Is a Homolog of Werner  
559 Syndrome Helicase and RNaseD. *Cell* **99**, 133–141 (1999).
- 560 54. Sijen, T. *et al.* On the role of RNA amplification in dsRNA-triggered gene silencing. *Cell* **107**,  
561 465–476 (2001).
- 562 55. Kennedy, S., Wang, D. & Ruvkun, G. A conserved siRNA-degrading RNase negatively regulates  
563 RNA interference in *C. elegans*. *Nature* **427**, 645–649 (2004).
- 564 56. Duchaine, T. F. *et al.* Functional proteomics reveals the biochemical niche of *C. elegans* DCR-1  
565 in multiple small-RNA-mediated pathways. *Cell* **124**, 343–354 (2006).
- 566 57. Pavelec, D. M., Lachowiec, J., Duchaine, T. F., Smith, H. E. & Kennedy, S. Requirement for the  
567 ERI/DICER complex in endogenous RNA interference and sperm development in *Caenorhabditis*  
568 *elegans*. *Genetics* **183**, 1283–1295 (2009).
- 569 58. Gu, W. *et al.* Distinct argonaute-mediated 22G-RNA pathways direct genome surveillance in the  
570 *C. elegans* germline. *Mol. Cell* **36**, 231–244 (2009).
- 571 59. Gent, J. I. *et al.* Distinct phases of siRNA synthesis in an endogenous RNAi pathway in *C.*  
572 *elegans* soma. *Mol. Cell* **37**, 679–689 (2010).
- 573 60. Conine, C. C. *et al.* Argonautes ALG-3 and ALG-4 are required for spermatogenesis-specific

- 574 26G-RNAs and thermotolerant sperm in *Caenorhabditis elegans*. *Proc. Natl. Acad. Sci. U. S. A.*  
575 **107**, 3588–3593 (2010).
- 576 61. Billi, A. C. *et al.* The *Caenorhabditis elegans* HEN1 Ortholog, HENN-1, Methylates and Stabilizes  
577 Select Subclasses of Germline Small RNAs. *PLoS Genet.* **8**, e1002617 (2012).
- 578 62. Kamminga, L. M. *et al.* Differential Impact of the HEN1 Homolog HENN-1 on 21U and 26G RNAs  
579 in the Germline of *Caenorhabditis elegans*. *PLoS Genet.* **8**, e1002702 (2012).
- 580 63. Albertson, D. G. & Thomson, J. N. The kinetochores of *Caenorhabditis elegans*. *Chromosoma*  
581 **86**, 409–428 (1982).
- 582 64. Bernard, P. *et al.* Requirement of heterochromatin for cohesion at centromeres. *Science* **294**,  
583 2539–2542 (2001).
- 584 65. Steiner, F. A. & Henikoff, S. Holocentromeres are dispersed point centromeres localized at  
585 transcription factor hotspots. *eLife Sciences* **3**, e02025 (2014).
- 586 66. Ollion, J., Cochenec, J., Loll, F., Escudé, C. & Boudier, T. TANGO: a generic tool for high-  
587 throughput 3D image analysis for studying nuclear organization. *Bioinformatics* **29**, 1840–1841  
588 (2013).
- 589
